# Supplementary material for: Gate-Voltage-Modulated Spin Precession in Graphene/WS2 Field-Effect Transistors
Source: MDPI journal article supplement (doi:10.3390/electronics10222879), 2021-11-22
Supplement: s1 [file s1]

Archive with 1 entries (1 files):
- electronics-1445613-supplementary.pdf
