# Supplementary material for: Gate-Voltage-Modulated Spin Precession in Graphene/WS2 Field-Effect Transistors
Source: MDPI journal article supplement (doi:10.3390/electronics10222879), 2021-11-22
Supplement: s1 [file s1 › electronics-1445613-supplementary.pdf]

Supporting Information

# Gate-Voltage-Modulated Spin Precession in Graphene/WS<sub>2</sub> Field-Effect Transistors

Amir Muhammad Afzal <sup>1,2</sup>, Muhammad Farooq Khan <sup>3</sup> and Jonghwa Eom <sup>1,\*</sup>

<sup>1</sup> Department of Physics & Astronomy, Graphene Research Institute—Texas Photonics Center International Research Center (GRI-TPC IRC), Sejong University, Seoul 05006, Korea; Amirafzal461@gmail.com

<sup>2</sup> Department of Physics, Riphah International University, 13 Raiwind Road, Lahore 54000, Pakistan

<sup>3</sup> Department of Electrical Engineering, Sejong University, Seoul 05006, Korea; mfk.sejong@gmail.com

\* Correspondence: eom@sejong.ac.kr

### Device characterization and measurements

Figure S1 shows a schematic diagram showing the fabrication process flow of a graphene/WS<sub>2</sub> field-effect transistor's heterostructure device. First, we cleaned the substrate (SiO<sub>2</sub>/p++ Si) with hot acetone and methanol to remove the residue and then dried it with nitrogen. The WS<sub>2</sub> flake was exfoliated on the SiO<sub>2</sub> substrate using Scotch tape, and made a large pattern. Then, we placed the BLG on top of polydimethylsiloxane (PDMS) by mechanical exfoliation from commercial graphite and transferred it onto the WS<sub>2</sub> flake.

Figure S2(a) illustrates an optical microscopy image of the final BLG/ML-WS<sub>2</sub> heterostructure spin FET with ferromagnetic (FM) source and drain contact. Consequently, we made an FM electrode on the BLG/ML-WS<sub>2</sub>. The BLG channel length ( $L$ ) and width ( $W$ ) were 1  $\mu\text{m}$  and 2.3  $\mu\text{m}$ , respectively. To observe the surface morphology of WS<sub>2</sub> and BLG, AFM was used. AFM was used to confirm the thickness of ML-WS<sub>2</sub> and BLG on SiO<sub>2</sub> (Fig. S2(b)). The height profiles reveal the thickness of ML-WS<sub>2</sub> (~19 nm) and BLG (~0.8 nm) in Fig. S2(c) and (d), respectively.

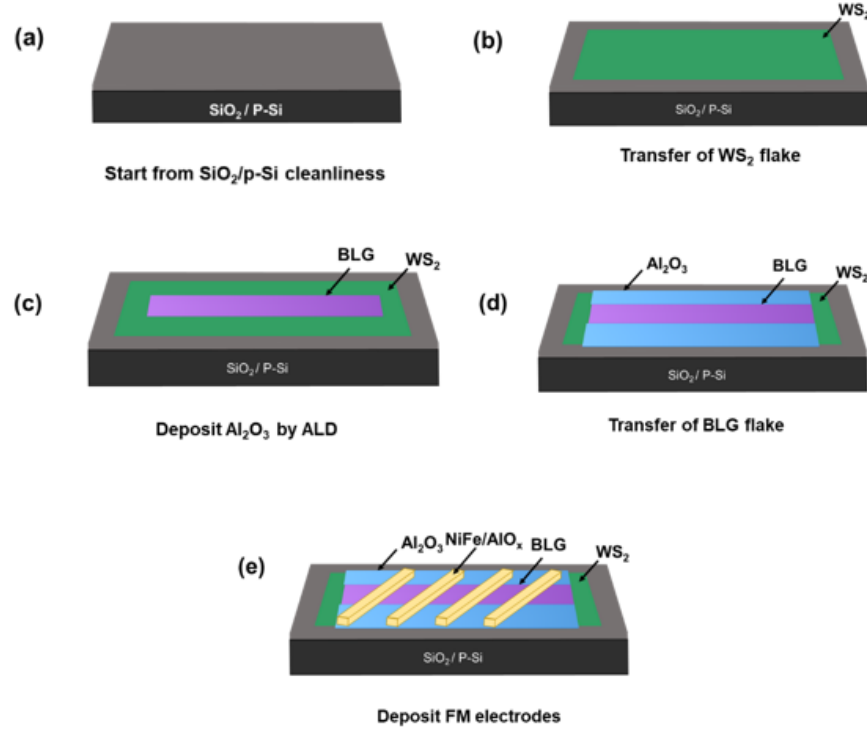

**Figure S1.** Schematic diagram showing the fabrication process flow of a graphene/WS<sub>2</sub> field-effect transistor's heterostructure device. (a)–(e) Schematic procedures of the device fabrication.

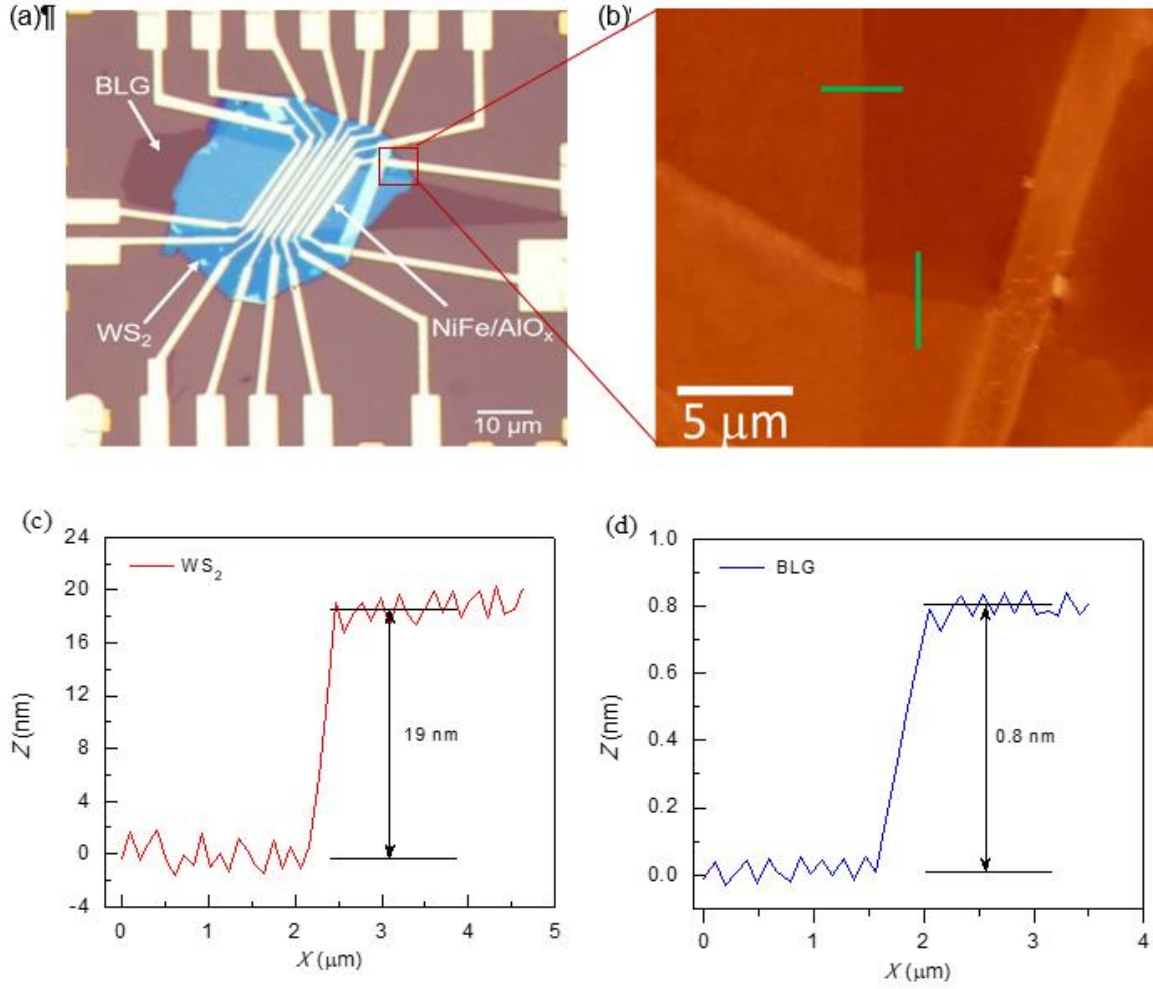

**Figure S2.** Structure of the BLG/ML-WS<sub>2</sub> spin FET. (a) An optical microscope image of the BLG/ML-WS<sub>2</sub> heterostructure device with FM source and drain contact with local measurement geometry. The FM electrodes are patterned at 45° with respect to the BLG channel. The length and width of the graphene channel were 1 μm and 2.3 μm, respectively. (b) AFM image of the device showing WS<sub>2</sub> and BLG on SiO<sub>2</sub>. (c) The height profile of WS<sub>2</sub>. The thickness of the WS<sub>2</sub> is ~19 nm. (d) The height profile of BLG. The thickness of the BLG flake is ~0.8 nm.

#### Raman spectra of the BLG/ML-WS<sub>2</sub> spin FET

To identify the structural fingerprint of both BLG and WS<sub>2</sub>, the Raman spectra were examined with a Renishaw micro-spectrometer over a wavenumber range of 1100 to 3200 cm<sup>-1</sup> for BLG and 200 to 500 cm<sup>-1</sup> for WS<sub>2</sub> with a laser of 514.5 nm. To avoid local heating, the power was fixed to less than ~1.0 mW with a spot size of 1 μm. The Raman spectra of ML-WS<sub>2</sub> and BLG on SiO<sub>2</sub> are shown in Fig. S3(a) and (b). The E<sub>2g</sub><sup>1</sup> and A<sub>1</sub> peaks of WS<sub>2</sub> appear at 351 cm<sup>-1</sup> and 418 cm<sup>-1</sup>, respectively.

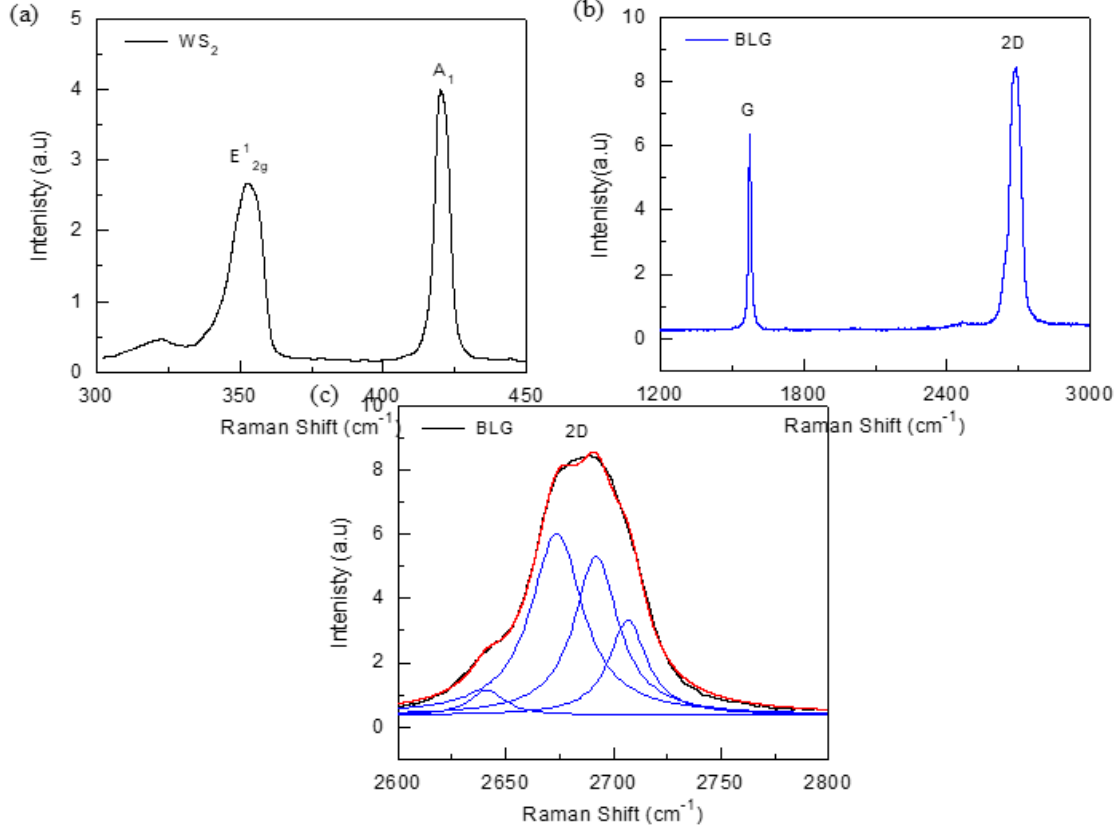

**Figure S3.** Raman spectra of the BLG/ML-WS<sub>2</sub> spin FET. (a) Raman spectrum of multilayers of WS<sub>2</sub>. The peaks  $E_{2g}^1$  and  $A_1$  appear at 351 cm<sup>-1</sup> and 418 cm<sup>-1</sup>, respectively. (b) Raman spectrum of BLG. (c) Raman spectrum of BLG 2D peak. The peak is fitted by four Lorentzian peaks, which confirm the nature of BLG.

In the case of BLG, the Raman G and 2D peaks appear around 1587 cm<sup>-1</sup> and 2685 cm<sup>-1</sup>, respectively. The ratio of intensities of the G to 2D peaks ( $I_{2D}/I_G$ ) is ~1.2, which is consistent with the previously reported value for BLG [1]. Further, the 2D peak is fitted by four Lorentzian peaks, which confirm the nature of BLG (Fig. S3(c)).

#### Dirac Point measurement of BLG on WS<sub>2</sub>

First, we characterized the basic electrical transport properties of Gr/WS<sub>2</sub> vdW heterostructure devices (sample # 2) to confirm the disappearance of the Dirac point in the case of an FM electrode. Fig. S4(a) shows the final device, in which graphene is outlined by the white dashed line. The different pairs of FM and Cr/Au electrodes were patterned by electron-beam lithography on WS<sub>2</sub>, BLG, and BLG/WS<sub>2</sub> heterostructure devices (Fig. S4(a)). First, we measured the transfer characteristics as a function of  $V_{bg}$  of WS<sub>2</sub> with Cr/Au (purple circle) and determined the threshold voltage ( $V_{th}$  ~ 10 V), as shown in Fig. S4(b).

Secondly, we made NiFe (red circle) and Cr/Au (blue circle) electrodes on BLG/SiO<sub>2</sub> and measured their electrical transport properties (Fig. S4(a)). The resistance ( $R_{xx}$ ) of BLG as a function of back-gate voltage ( $V_{bg}$ ) is shown in Fig. S4(c).  $V_{bg}$  is swept from -40 V to +40 V, and resistance is measured. In the case of Cr/Au, the charge neutrality point (CNT) (i.e., the Dirac point) almost exits at  $V_{bg}$  ~ 2 V. However, in the case of the NiFe electrode, the CNT is shifted at  $V_{bg}$  ~ 31 V due to p-type doping of graphene by NiFe, as shown in Fig. S4(c).

Thirdly, we measured the BLG/WS<sub>2</sub> heterostructure with Cr/Au and NiFe contacts. We observed that the CNT lies at  $V_{bg}$  ~ 0 V for Cr/Au electrodes. When  $V_{bg}$  is increased from -40 V, the resistance of the Gr/WS<sub>2</sub> heterostructure device increases until  $V_{bg}$  reaches the CNT. However, the resistance is asymmetric with respect to the CNT. The resistance of the heterostructure device does not change when  $V_{bg}$  is increased above the threshold voltage ( $V_{th}$  ~ 10 V) of the bottom WS<sub>2</sub> layer. However, we measured the BLG/WS<sub>2</sub> heterostructure with NiFe electrodes and did not

observe any Dirac point, as shown in Fig. S4(c). In fact, the NiFe electrode shifts the Dirac point at positive back-gate voltage ( $V_{bg} \sim 31$  V) by p-type doping, and the bottom  $WS_2$  layer works in a similar manner to a gate electric field sink at  $V_{bg} > V_{th} \sim 10$  V. At  $V_{bg} > 10$  V (gate voltages larger than the threshold voltage of  $WS_2$ ), the electrons start to accumulate at the bottom surface of the  $WS_2$  flake and screen the influence of the gate electric field.

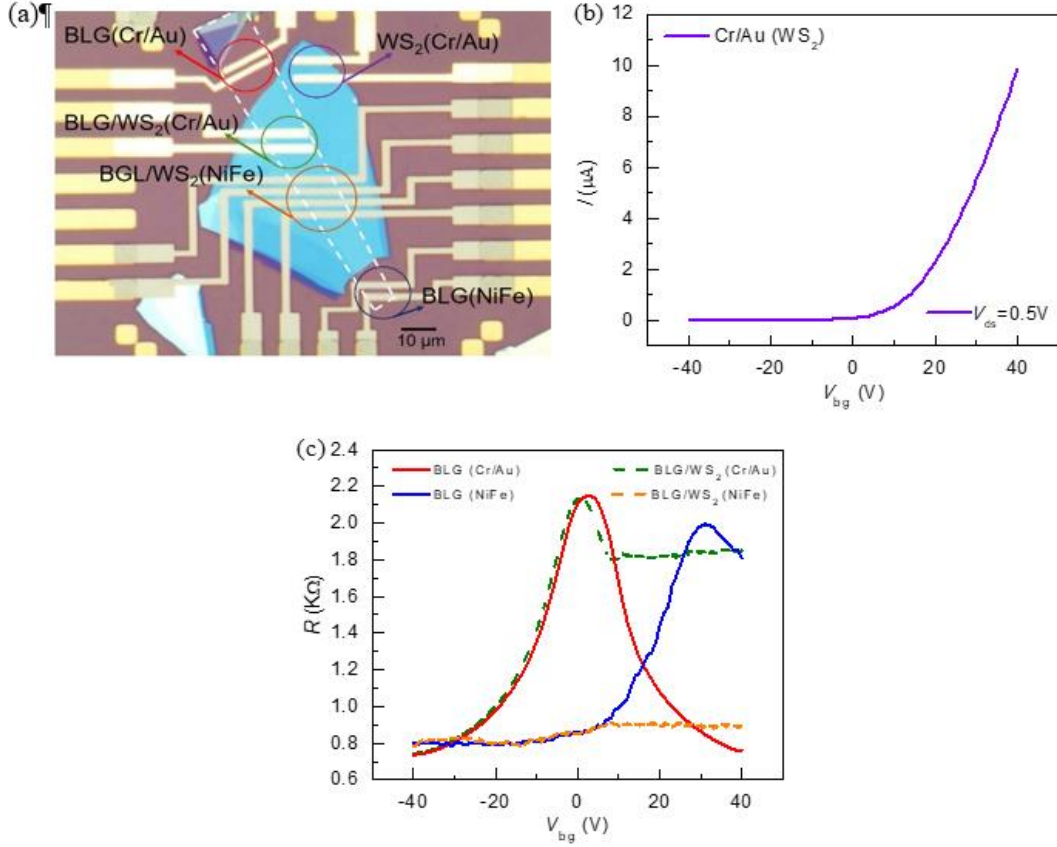

**Figure S4.** Doping effect by NiFe electrodes and screening effect by WS<sub>2</sub> layer. (a) An optical image of the final device in which graphene is marked with the white dashed line on SiO<sub>2</sub> and WS<sub>2</sub> (sample #2). The different pairs of NiFe and Cr/Au electrodes were patterned by electron-beam lithography on WS<sub>2</sub>, BLG, and BLG/WS<sub>2</sub> heterostructure devices, which are illustrated by purple, red, green, orange, and blue circles for WS<sub>2</sub> (Cr/Au), BLG (Cr/Au), BLG/WS<sub>2</sub> (Cr/Au), BLG/WS<sub>2</sub> (NiFe), and BLG (NiFe), respectively. (b) The transfer characteristics as a function of  $V_{bg}$  of WS<sub>2</sub> with Cr/Au (purple circle); the threshold voltage ( $V_{th}$ ) was found around 10 V. (c) The resistance of BLG on SiO<sub>2</sub> and WS<sub>2</sub> as a function of back-gate voltage ( $V_{bg}$ ) with different electrodes.

#### Gate-dependent Hanle spin precession measurement

We performed experiments on NL Hanle spin precession signals at various  $V_{bg}$ . For this purpose, we applied an in-plane magnetic field,  $B_{||}$ , to align the magnetization of FM contacts parallel or antiparallel to each other. The perpendicular magnetic field ( $B_{\perp}$ ) was then swept to detect the Hanle spin signal. Fig. S5(a) shows the gate-dependent NL Hanle spin signal at different back-gate voltages. Each trace was taken with 10 V steps in the back gate from  $V_{bg} = -40$  V to  $+40$  V. Then, we calculated the change in NL Hanle spin signal ( $\Delta R_{NL} = (R_{NL}^{Parallel} - R_{NL}^{Anti-parallel})/2$ ) at all  $V_{bg}$ .

By fitting the raw data of the Hanle spin signal ( $\Delta R_{NL}$ ) using Equation (3), we extracted  $\tau_s$  in the range of  $\tau_s \approx 66.05 - 2.02$  ps, depending on  $V_{bg}$ . Furthermore, we calculated the Rashba-type SOI strength ( $\alpha \approx 6.14$  meVnm) using Equation (4). Fig. S5(b) indicates the  $\alpha$  of the spin FET as a function of  $V_{bg}$ . For  $V_{bg} < 0$ ,  $V_{bg}$  efficiently changes  $\alpha$ , whereas  $\alpha$  does not change much when  $V_{bg} > 0$  due to the screening effect of the n-type WS<sub>2</sub> film. From the Rashba parameter  $\alpha$ , we obtained the spin precession angle with respect to  $V_{bg}$  by using Equation (5), as shown in Fig. S5(c). When  $V_{bg}$  was varied from -40 to +40 V in our BLG/ML-WS<sub>2</sub> spin FET, the total change of precession angle was  $\Delta\theta \approx 319^\circ$ .

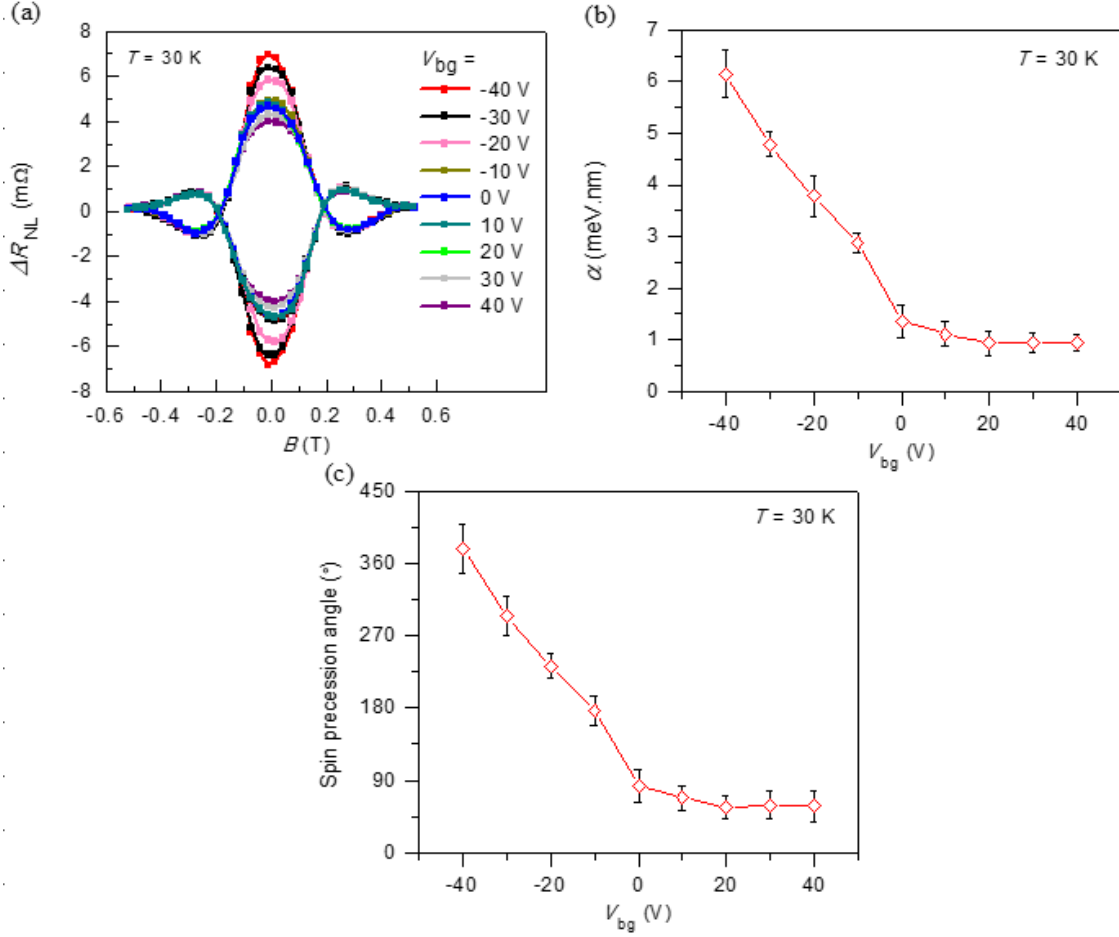

**Figure S5.** Gate modulation of spin precession angle in the BLG/ML-WS<sub>2</sub> spin FET. (a) Modulation of Hanle spin precession with back-gate voltage. Hanle spin signal measured at different back gates at 30 K. (b) Gate voltage dependence of the spin-orbit interaction parameter  $\alpha$ . (c) Estimated spin precession angle as a function of  $V_{bg}$  at 30 K.

### Spin transport parameters

By fitting the raw data of the Hanle spin signal ( $\Delta R_{NL} = (R_{NL}^{Parallel} - R_{NL}^{Anti-parallel})/2$ ) at all  $V_{bg}$  using Equation (3), we extracted  $\tau_s$  in the range of  $\tau_s \approx 66.05 - 2.02$  ps depending on  $V_{bg}$  as shown in Fig. S6(a). Further, we calculated momentum scattering time,  $\tau_p$ , from  $D = v_F^2 \tau_p$ , where  $v_F$  is the Fermi velocity and  $D$  is a diffusion constant calculated using the Einstein relation  $\sigma = e^2 D N_{2D}(E_F)$ , where  $N_{2D}(E_F)$  is the density of states of graphene at the Fermi level.

We determined that both quantities were inversely proportional to each other, and the D'yakonov-Perel' (DP) mechanism is dominant. We observed a clear relation at  $V_{bg} = -40$  V to 10V. However, at a higher back-gate voltage ( $V_{bg} > 10$  V), we did not perceive a large change in either quantity due to the WS<sub>2</sub> contribution. Fig. S6(b) demonstrates the spin diffusion length ( $\lambda_s = \sqrt{D_s \tau_s}$ ) as being in the range of  $0.98 - 0.15 \mu m$  depending on  $V_{bg}$ . By using the values of  $\tau_p$  and  $\tau_s$  from Fig. S6(a), we calculated the Rashba spin splitting ( $\Delta_R$ ) using  $\frac{1}{\tau_s} = \frac{4\Delta_R^2}{\hbar^2} \tau_p$ , as shown in Fig. S6(c).

We have compared physical quantities of our bilayer graphene/multilayer WS<sub>2</sub> field-effect transistor with previously reported parameters of graphene in Table S1.

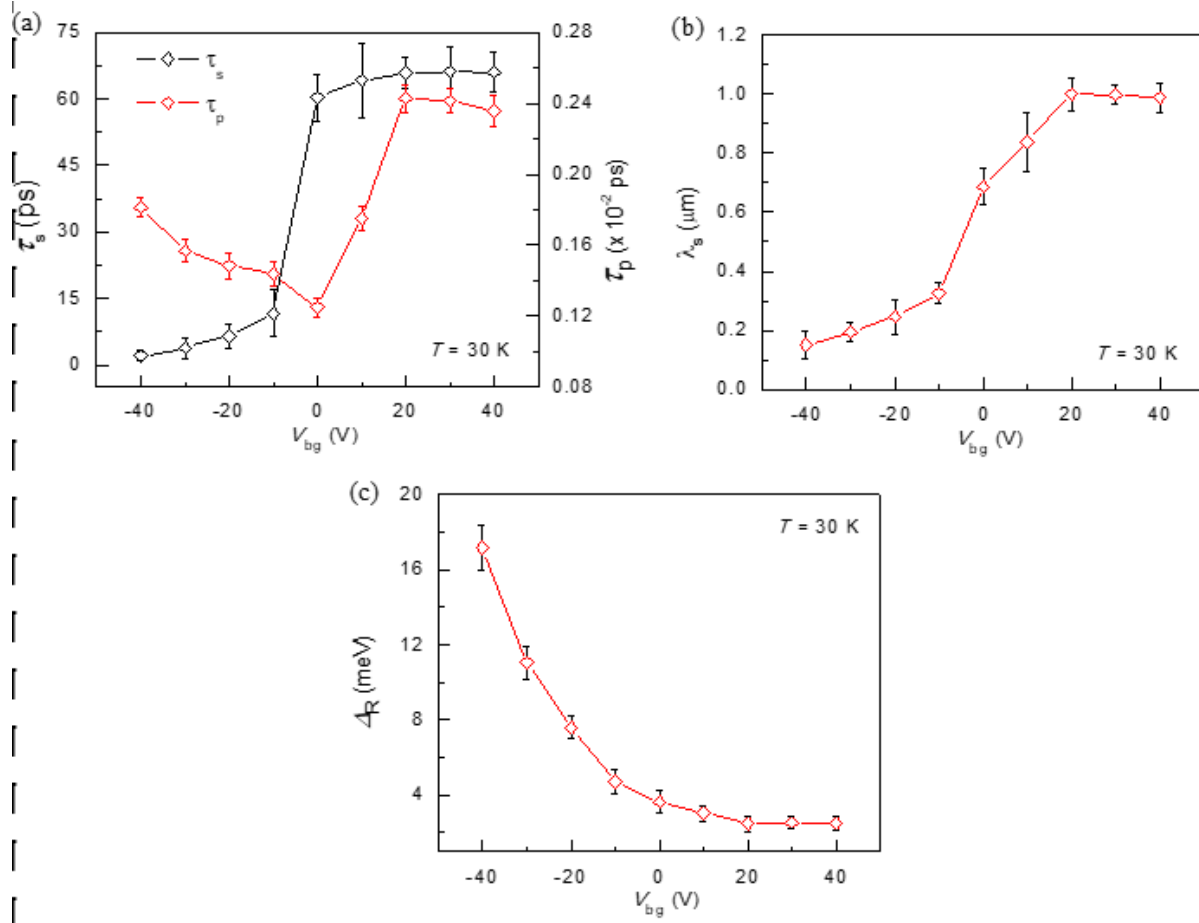

**Figure S6.** Spin transport parameters. (a) Gate dependence of  $\tau_s$ , which is derived from the fitting of the Hanle spin precession in Equation (3). (b) Gate dependence of  $\lambda_s$ . (c) Rashba spin splitting ( $\Delta_R$ ) as a function of  $V_{bg}$  at 30 K.

Table S1. Comparison of key parameters of bilayer graphene/multilayer  $\text{WS}_2$  field-effect transistor with previously reported parameters in pristine graphene.

| Devices           | $\lambda_s$ ( $\mu\text{m}$ ) | $\tau_s$ (ps) | $\alpha$ (meVnm) | $\Delta\theta$ ( $^\circ$ ) | Ref.      |
|-------------------|-------------------------------|---------------|------------------|-----------------------------|-----------|
| Gr                | 0.8                           | 172           | -----            | -----                       | [2]       |
| Gr/h-BN           | 0.7                           | 105           | -----            | -----                       | [3]       |
| Gr                | 0.65                          | 100           | -----            | -----                       | [4]       |
| Gr                | 1.4                           | 84            | -----            | -----                       | [5]       |
| Gr                | 1.3                           | 125           | -----            | -----                       | [6]       |
| Gr/ $\text{WS}_2$ | 0.98                          | 2.02          | 6                | 309                         | This work |

## References

1. Ferrari, A.C.; Meyer, J.C.; Scardaci, V.; Casiraghi, C.; Lazzeri, M.; Mauri, F.; Piscanec, S.; Jiang, D.; Novoselov, K.S.; Roth, S.J.P.r.l. Raman spectrum of graphene and graphene layers. **2006**, *97*, 187401.
2. Dankert, A.; Kamalakar, M.V.; Bergsten, J.; Dash, S.P.J.A.P.L. Spin transport and precession in graphene measured by nonlocal and three-terminal methods. **2014**, *104*, 192403.
3. Kamalakar, M.V.; Dankert, A.; Kelly, P.J.; Dash, S.P.J.S.r. Inversion of spin signal and spin filtering in ferromagnetic hexagonal boron nitride-graphene van der Waals heterostructures. **2016**, *6*, 1-9.
4. Jedema, F.; Heersche, H.; Filip, A.; Baselmans, J.; Van Wees, B.J.N. Electrical detection of spin precession in a metallic mesoscopic spin valve. **2002**, *416*, 713-716.
5. Han, W.; Pi, K.; Bao, W.; McCreary, K.; Li, Y.; Wang, W.; Lau, C.; Kawakami, R.J.A.P.L. Electrical detection of spin precession in single layer graphene spin valves with transparent contacts. **2009**, *94*, 222109.
6. Tombros, N.; Jozsa, C.; Popinciuc, M.; Jonkman, H.T.; Van Wees, B.J.J.n. Electronic spin transport and spin precession in single graphene layers at room temperature. **2007**, *448*, 571-574.
